# Supplementary material
Source: PubMed Central journal article supplement (PMC1904172)
Supplement: pnas_0701967104_1.pdf [file pnas_0701967104_1.pdf]

## SI Methods

Under the conditions of the experiments, the effective  $G_t$  concentration ( $[G\alpha\beta\gamma]$ , i.e., the concentration of  $G_t$  that is immediately available for interaction with  $R^*$ ) is lower than the total  $G_t$  concentration  $[G_t]_{tot}$ . This is due to dissociation of  $G_t$  into its subunits ( $G\alpha$  and  $G\beta\gamma$ ) and  $G_t$  binding to detergent micelles ( $M$ ), which do not contain rhodopsin. In other words, dissociated  $G_t$  and  $G_t$  bound to micelles without rhodopsin is not competent to interact with  $R^*$ . Because the isolated  $G\alpha$  subunit is highly soluble, we assume that only  $G\alpha\beta\gamma$  and  $G\beta\gamma$  bind to detergent micelles. The resulting equilibria are given below:

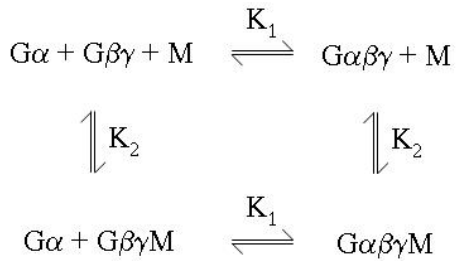

According to the reaction scheme, the dissociation constant of  $G_t$  subunit dissociation ( $K_1$ ) is given by

$$K_1 = \frac{[G\alpha] \cdot [G\beta\gamma]}{[G\alpha\beta\gamma]} = \frac{[G\alpha] \cdot [G\beta\gamma M]}{[G\alpha\beta\gamma M]}, \quad [1]$$

and the dissociation constant of micelle interaction with  $G\alpha\beta\gamma$  or  $G\beta\gamma$  ( $K_2$ ) is given by

$$K_2 = \frac{[G\beta\gamma] \cdot [M]}{[G\beta\gamma M]} = \frac{[G\alpha\beta\gamma] \cdot [M]}{[G\alpha\beta\gamma M]}. \quad [2]$$

The mass balance equations for  $G_t$ ,  $G\alpha$ ,  $G\beta\gamma$ , and  $M$  are:

$$[G_t]_{tot} = [G\alpha]_{tot} = [G\beta\gamma]_{tot} \quad [3]$$

$$[G\beta\gamma]_{tot} = [G\beta\gamma] + [G\beta\gamma M] + [G\alpha\beta\gamma] + [G\alpha\beta\gamma M] \quad [4]$$

$$[G\alpha]_{tot} = [G\alpha] + [G\alpha\beta\gamma] + [G\alpha\beta\gamma M] \quad [5]$$

$$[M]_{tot} = [M] + [G\beta\gamma M] + [G\alpha\beta\gamma M] \quad [6]$$

The mass balance equations assume that the concentration of  $G_t$  complexed with  $R^*$  ( $< 3$  nM) or bound to detergent micelles containing  $R^*$  is negligible.

Because of the mutual dependence of the variables, it is not possible to find an analytic solution for  $[G\alpha\beta\gamma]$  as a function of  $[G_t]_{tot}$ . For numerical computing, two additional variables are defined:

$$x_1 = \frac{G\alpha}{K_1} = \frac{G\alpha\beta\gamma}{G\beta\gamma} \quad [7]$$

$$x_2 = \frac{M}{K_2} = \frac{G\beta\gamma M}{G\beta\gamma} \quad [8]$$

Using Eqs. 2, 7, and 8, the variables  $[G\alpha\beta\gamma]$ ,  $[G\beta\gamma M]$ , and  $[G\alpha\beta\gamma M]$  can now be expressed as functions of  $[G\beta\gamma]$ :

$$[G\alpha\beta\gamma] = x_1 \cdot [G\beta\gamma] \quad [9]$$

$$[G\beta\gamma M] = x_2 \cdot [G\beta\gamma] \quad [10]$$

$$[G\alpha\beta\gamma M] = \frac{[G\alpha\beta\gamma] \cdot [G\beta\gamma M]}{[G\beta\gamma]} = x_1 \cdot x_2 \cdot [G\beta\gamma] \quad [11]$$

Substituting for  $[G\alpha\beta\gamma]$ ,  $[G\beta\gamma M]$ , and  $[G\alpha\beta\gamma M]$  in the balance equations (Eqs. 4–6) yields

$$[G\beta\gamma] = \frac{[G\beta\gamma]_{tot}}{1 + x_1 + x_2 + x_1 \cdot x_2} \quad [12]$$

$$[G\alpha] = [G\alpha]_{tot} - x_1 \cdot [G\beta\gamma] - x_1 \cdot x_2 [G\beta\gamma] \quad [13]$$

$$[M] = [M]_{tot} - x_2 \cdot [G\beta\gamma] - x_1 \cdot x_2 \cdot [G\beta\gamma] \quad [14]$$

Eqs. 7–9 and 12–14 were used for numerical calculation of the effective  $G_t$  concentration  $[G\alpha\beta\gamma]$  as a function of total added  $G_t$  ( $[G_t]_{tot}$ ) in the fitting procedure (see below). Together with the numerical calculation of  $[G\alpha\beta\gamma]$ , the dependence of the initial  $G_t$  activation rate ( $v$ ) on  $[G_t]_{tot}$  was fitted to a Michaelis–Menten type hyperbolic function

$$v = \frac{V_{max} \cdot [G\alpha\beta\gamma]}{K_m + [G\alpha\beta\gamma]} \quad [15]$$

where  $V_{max}$  and  $K_m$  denote the maximum value of  $v$  and the Michaelis constant, respectively. The data points of the titration experiments performed at three different DDM concentrations were

simultaneously fitted using the same set of parameters  $V_{\max}$ ,  $K_1$ , and  $K_2$  but with individual Michaelis constants ( $K_m^1$ , 0.006% DDM;  $K_m^2$ , 0.008% DDM, and  $K_m^3$ , 0.01% DDM).

The total concentration of DDM micelles  $[M]_{tot}$  was estimated as follows. The data shown in the inset of Fig. 5B indicate that under the experimental conditions, the critical micelle concentration of DDM is 0.005%. Together with the molecular mass of DDM (511 g/mol) and the aggregation number of DDM [98 monomers per micelle (1)], the concentrations of DDM micelles are 1.2  $\mu\text{M}$  (0.006% DDM), 1.6  $\mu\text{M}$  (0.008% DDM), and 2.0  $\mu\text{M}$  (0.01% DDM), respectively.

### Fitting Procedure

The data points of the titration experiments performed at three different DDM concentrations (Fig. 5B) were numerically fitted with the following fitting procedure using Scientist software (MicroMath). The superscript of the variables identifies the set of titration experiment (1: 0.006% DDM; 2: 0.008% DDM, and 3: 0.01% DDM). All concentrations are given in  $\mu\text{M}$ .

Independent variable:  $[G_t]_{tot}$   
 Dependent variables:  $v^1, v^2, v^3$   
 Parameters:  $K_1, K_2, V_{\max}, K_m^1, K_m^2, K_m^3$

$$[G\alpha]_{tot} = [G_t]_{tot}$$

$$[G\beta\gamma]_{tot} = [G_t]_{tot}$$

$$[M]_{tot}^1 = 1.2$$

$$[M]_{tot}^2 = 1.6$$

$$[M]_{tot}^3 = 2.0$$

$$x_1^1 = [G\alpha]^1 / K_1$$

$$x_1^2 = [G\alpha]^2 / K_1$$

$$x_1^3 = [G\alpha]^3 / K_1$$

$$x_2^1 = [M]^1 / K_2$$

$$x_2^2 = [M]^2 / K_2$$

$$x_2^3 = [M]^3 / K_2$$

$$[G\beta\gamma]^1 = [G\beta\gamma]_{tot} / (1 + x_1^1 + x_2^1 + x_1^1 \cdot x_2^1)$$

$$[G\beta\gamma]^2 = [G\beta\gamma]_{tot} / (1 + x_1^2 + x_2^2 + x_1^2 \cdot x_2^2)$$

$$[G\beta\gamma]^3 = [G\beta\gamma]_{tot} / (1 + x_1^3 + x_2^3 + x_1^3 \cdot x_2^3)$$

$$[G\alpha]^1 = [G\alpha]_{tot} - x_1^1 \cdot [G\beta\gamma]^1 - x_1^1 \cdot x_2^1 \cdot [G\beta\gamma]^1$$

$$[G\alpha]^2 = [G\alpha]_{tot} - x_1^2 \cdot [G\beta\gamma]^2 - x_1^2 \cdot x_2^2 \cdot [G\beta\gamma]^2$$

$$[G\alpha]^3 = [G\alpha]_{tot} - x_1^3 \cdot [G\beta\gamma]^3 - x_1^3 \cdot x_2^3 \cdot [G\beta\gamma]^3$$

$$[M]^1 = [M]_{tot}^1 - x_2^1 \cdot [G\beta\gamma]^1 - x_1^1 \cdot x_2^1 \cdot [G\beta\gamma]^1$$

$$[M]^2 = [M]_{tot}^2 - x_2^2 \cdot [G\beta\gamma]^2 - x_1^2 \cdot x_2^2 \cdot [G\beta\gamma]^2$$

$$[M]^3 = [M]_{tot}^3 - x_2^3 \cdot [G\beta\gamma]^3 - x_1^3 \cdot x_2^3 \cdot [G\beta\gamma]^3$$

$$[G\alpha\beta\gamma]^1 = x_1^1 \cdot [G\beta\gamma]^1$$

$$[G\alpha\beta\gamma]^2 = x_1^2 \cdot [G\beta\gamma]^2$$

$$[G\alpha\beta\gamma]^3 = x_1^3 \cdot [G\beta\gamma]^3$$

$$v^1 = V_{max} \cdot [G\alpha\beta\gamma]^1 / (K_m^1 + [G\alpha\beta\gamma]^1)$$

$$v^2 = V_{max} \cdot [G\alpha\beta\gamma]^2 / (K_m^2 + [G\alpha\beta\gamma]^2)$$

$$v^3 = V_{max} \cdot [G\alpha\beta\gamma]^3 / (K_m^3 + [G\alpha\beta\gamma]^3)$$

$$0 < [G\alpha]^1 < [G\alpha]_{tot}$$

$$0 < [G\alpha]^2 < [G\alpha]_{tot}$$

$$0 < [G\alpha]^3 < [G\alpha]_{tot}$$

$$0 < [M]^1 < [M]_{tot}^1$$

$$0 < [M]^2 < [M]_{tot}^2$$

$$0 < [M]^3 < [M]_{tot}^3$$

---

## References

1. Rosevear P, VanAken T, Baxter J, Ferguson-Miller S (1980) *Biochemistry* 19:4108-4115.
